# Supplementary material for: Measurement report: Emission factors of NH 3 and NH x for wildfires and agricultural fires in the United States
Source: Copernicus journal article supplement (doi:10.5194/acp-23-2331-2023), 2023-02-17
Supplement: Supplementary file 1 [file acp-23-2331-2023-supplement.pdf]

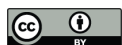

*Supplement of*

**Measurement report: Emission factors of  $\text{NH}_3$  and  $\text{NH}_x$   
for wildfires and agricultural fires in the United States**

**Laura Tomsche et al.**

*Correspondence to:* Armin Wisthaler ([armin.wisthaler@kjemi.uio.no](mailto:armin.wisthaler@kjemi.uio.no))

The copyright of individual parts of the supplement might differ from the article licence.

25 **Table S1: Main fuels of the six wildfires in the Western US that were sampled during FIREX-AQ 2019 and for which  $EF_{NH_3}$  values were obtained.**

| <b>Fire</b>                | <b>Major fuel types (%)</b>                                                                                                                                                                                                                                                    | <b>Fuel (FCCS 2014) 30m</b>                                                       |
|----------------------------|--------------------------------------------------------------------------------------------------------------------------------------------------------------------------------------------------------------------------------------------------------------------------------|-----------------------------------------------------------------------------------|
| Shady                      | Modified and managed mesic timber litter 3 (34.4%), modified and managed xeric grass shrub 1 (21.5%), modified and managed xeric timber litter 3 (18.0%), modified and managed xeric understory 2 (10.8%), Urban-Barren (6.5%)                                                 | Modified or Managed Xeric Understory 2                                            |
| Williams Flats<br>3.8.2019 | Douglas-fir-Pacific ponderosa pine/oceanspray forest (29.3%), Idaho fescue-bluebunch wheatgrass grassland (19.6%), Sagebrush shrubland – post prescribed burn (12.8%), Wheatgrass-cheatgrass grassland – exotic species (10.4%), Ponderosa pine savanna (8.0%)                 | Sagebrush shrubland - post prescribed burn                                        |
| Williams Flats<br>6.8.2019 | Douglas-fir-Pacific ponderosa pine/oceanspray forest (56.5%), Idaho fescue-bluebunch wheatgrass grassland (9.2%), Wheatgrass-cheatgrass grassland – exotic species (6.5%), Idaho fescue-bluebunch wheatgrass grassland – post fire (5.5%), Douglas-fir/ceanothus forest (5.3%) | Sagebrush shrubland - post prescribed burn                                        |
| Williams Flats<br>7.8.2019 | Douglas-fir-Pacific ponderosa pine/oceanspray forest (55.2%), Idaho fescue-bluebunch wheatgrass grassland (12.4%), Wheatgrass-cheatgrass grassland – exotic species (6.8%), Idaho fescue-bluebunch wheatgrass grassland – post fire (5.1%), Ponderosa pine savanna (5.0%)      | Sagebrush shrubland - post prescribed burn                                        |
| Castle<br>12.8.2019        | Ponderosa pine-two-needle pinyon-Utah juniper forest (24.4%), Douglas-fir-Pacific ponderosa pine/oceanspray forest (24.4%), modified and managed xeric shrub (6.8%), Madrean pine-oak forest (6.0%), modified and managed xeric grass shrub 1 (6.0%)                           | Modified or Managed Xeric Timber Litter 3                                         |
| Castle<br>13.8.2019        | Ponderosa pine-two-needle pinyon-Utah juniper forest (24.4%), Douglas-fir-white fir-ponderosa pine forest (13.7%), Madrean pine-oak forest (12.3%), Quaking aspen forest (10.9%), Interior Douglas-fir-ponderosa pine/gambel oak forest (7.8%)                                 | Modified or Managed Xeric Timber Litter 3                                         |
| Ridge Top                  | Bluebunch wheatgrass-bluegrass grassland (66.2%), Ponderosa pine savanna (7.4%), modified and managed xeric grass shrub 1 (7.3%), sagebrush shrubland - post prescribed burned (7.2%), Greasewood shrubland (5.9%)                                                             | Modified or Managed Xeric Grass Shrub                                             |
| Mica/Lick Creek            | Grand fir-Douglas-fir forest (69.9%), Douglas-fir-Pacific ponderosa pine/oceanspray forest (11.3%), Showy sedge-black alpine sedge grassland (7.0%), Black cottonwood-Douglas-fir-quaking aspen forest (4.9%), modified and managed xeric shrub 2 (2.6%)                       | Mica Creek: Grand fir-Douglas-fir forest<br>Lick Creek: Modified or Managed Mesic |
| Horsefly                   | Subalpine fir-lodgepole pine-whitebark pine-Engelmann spruce forest (42.8%), Douglas-fir-Pacific ponderosa pine/oceanspray forest (27.6%), Mature lodgepole pine forest (14.1%), Interior ponderosa pine-Douglas-fir forest (3.1%), Whitebark pine/subalpine fir forest (3.0%) | Subalpine fir-lodgepole pine                                                      |
